# Supplementary material for: In situ growth of SeOx films on the surface of Ni–Fe–selenide nanosheets as highly active and stable electrocatalysts for the oxygen evolution reaction
Source: Royal Society of Chemistry journal article supplement (doi:10.1039/d1ma01208h), 2022-01-01
Supplement: d1ma01208h1.pdf [file d1ma01208h1.pdf]

## Supporting Information

### ***In situ* growth of SeO<sub>x</sub> film on the surface of Ni-Fe-selenide nanosheets as highly active and stable electrocatalysts for oxygen evolution reaction**

Xiaonan Shang,<sup>a</sup> Weiheng Chen,<sup>b</sup> Zhong-Jie Jiang,<sup>c,\*</sup> Changsheng Song,<sup>a,\*</sup> and Zhongqing Jiang<sup>a,\*</sup>

<sup>a</sup> Key Laboratory of Optical Field Manipulation of Zhejiang Province, Department of Physics, Zhejiang Sci-Tech University, Hangzhou 310018, P. R. China. E-mail: zhongqingjiang@zstu.edu.cn

<sup>b</sup> Department of Mechanical Engineering, Ningbo University of Technology, Ningbo 315336, P. R. China.

<sup>c</sup> Guangdong Engineering and Technology Research Center for Surface Chemistry of Energy Materials & Guangzhou Key Laboratory for Surface Chemistry of Energy Materials, New Energy Research Institute, College of Environment and Energy, South China University of Technology, Guangzhou 510006, P. R. China. Email: eszjiang@scut.edu.cn and zhongjiejiang1978@hotmail.com

**This PDF file includes:**

**Experimental Section**

**Fig. S1 to S11**

**Tables S1-S2**

## 1. Experimental section

### 1.1 Chemicals

Hydrochloric acid (HCl, AR, 36.0–38.0%), ethanol (C<sub>2</sub>H<sub>5</sub>OH, 99.7%), nickel(II) nitrate hexahydrate (Ni(NO<sub>3</sub>)<sub>2</sub>·6H<sub>2</sub>O, 98%, Sigma-Aldrich), urea (CH<sub>4</sub>N<sub>2</sub>O, ≥ 99.5%, Sigma-Aldrich), selenium powder (Se, 99.9%, Sigma-Aldrich), hydrazine hydrate (N<sub>2</sub>H<sub>4</sub>·H<sub>2</sub>O, ≥98%, Alfa Aesar), potassium hydroxide (KOH, ≥85.0%, Alfa Aesar), and NiFe foam (thickness: 1.2 mm) were used as received. Commercial platinum/carbon (Pt/C, 20 wt.% Pt loading on carbon black, Johnson Matthey). Iridium black (Ir, 99.95%) was purchased from Alfa Aesar. Deionized water through Millipore system (Milli-Q<sup>®</sup>) was used.

### 1.2 Electrocatalytic measurements

All electrochemical measurements were performed at room temperature in a standard three-electrode system by electrochemical workstation (CHI760E), using a Pt foil as the counter electrode, a saturated calomel electrode (SCE) as the reference electrode, and the NiFe foam supported SeO<sub>x</sub>/FeNi<sub>x</sub>Se as the working electrode. Potentials vs. RHE are calculated using the equation:  $E_{\text{vs.RHE}} = E_{\text{vs.SCE}} + 1.068 \text{ V}$  in 1.0 M KOH. All the linear sweep voltammograms (LSV) were corrected by eliminating 95% IR compensation. All the OER tests were conducted from 0.191-0.791 V vs. SCE with a scan rate of 5 mV s<sup>-1</sup>, and the HER LSV curves were tested from -0.8 to -1.668 V vs. SCE with a scan rate of 10 mV s<sup>-1</sup>. And the corresponding Tafel plots were derived from LSV curves according to the Tafel semi-exponential equation:  $\eta = b \times \log |j| + a$ . Electrochemical impedance spectroscopy was measured in the frequency range of 10<sup>-2</sup> to 10<sup>5</sup> Hz with an AC perturbation potential of 5 mV. The electrochemical stability of SeO<sub>x</sub>/FeNi<sub>x</sub>Se (CMy-FeNi<sub>x</sub>Se) electrode was investigated by chronopotentiometry and multi-step chronopotentiometric tests. For comparison, Ir (loaded on NiFe foam), FeNi LDH, FeNi-LDH after HER electrochemical modification (CMy-FeNi LDH), NiFe Foam and NiFe Foam after HER electrochemical modification (CMy-NiFe Foam) electrodes were also prepared for OER

measurement. The effective electrochemical active surface area (ECSA) of the materials was proportional to the geometric double layer capacitance ( $C_{dl}$ ), which can be characterized by CV curves at various scan rates (10, 20, 30, 40, 50, 60, 70, 80, 90, 100  $\text{mV s}^{-1}$  from 0.18 V to 0.28 V vs. RHE were used). The  $C_{dl}$  was estimated by plotting the current densities difference ( $\Delta j = j_{\text{anodic}} - j_{\text{cathodic}}$ ) at the middle potential vs. scan rate. The resulting linear slope is twice that of the  $C_{dl}$ . The corresponding ECSA were calculated according to the following equation:

$$\text{ECSA} = \frac{C_{dl}}{C_s} \text{ cm}^2 \quad (1)$$

Where,  $C_s$  is the specific capacitance, and  $0.040 \text{ mF cm}^{-2}$  was adopted as the  $C_s$  value as regared to previous reports.<sup>1</sup>

The performance of the overall water splitting was conducted by a two-electrode system, using Pt/C (loaded on NiFe Foam) as the cathode and the NiFe foam supported  $\text{SeO}_x/\text{FeNi}_x\text{Se}$  as the anode.

### 1.3 Theoretical calculation details

Theoretical calculations have been performed within the framework of density functional theory (DFT) as implemented by the Vienna an initio Simulation Package (VASP).<sup>2, 3</sup> The exchange-correlation energy was treated in the generalized-gradient approximation (GGA) using Perdew-Burke-Ernzerhof (PBE) method.<sup>4</sup> The nano-model was constructed on the  $z$  direction of  $\text{Ni}_{1-x}\text{Fe}_x\text{Se}$  ( $\text{Ni}_{26}\text{Fe}_1\text{Se}_{27}$ ),  $\text{Ni}_{1-x}\text{Fe}_x\text{Se}@ \text{SeO}_2$  ( $\text{Ni}_{26}\text{Fe}_1\text{Se}_{27}@ \text{Se}_8\text{O}_{16}$ ) with 16 Å vacuum. The cutoff energy of plane wave was chosen at 450 eV. For the structure optimizations,  $4 \times 4 \times 1$  Monkhorst-Pack (MP) grids were used. The changes in total energies between two successive iteration steps were less than  $10^{-5}$  eV, and all the Hellmann-Feynman force acting on each atom was lower than 0.01 eV /Å. The adsorption free energies of O, \*OH and \*OOH on all structures were calculated by the formula  $\Delta G = \Delta E + \Delta ZPE - T\Delta S$ , where  $\Delta E$ ,  $\Delta ZPE$ ,  $\Delta S$  are the binding energy, zero point energy change and entropy change of H adsorption reaction, respectively. Herein, a solvation correction with energy equals to -0.22 eV is applied to only  $\Delta$

$E_{*OH}$  and  $\Delta E_{*OOH}$  since water molecule could solvate  $*OH$  and  $*OOH$  moieties with hydrogen bond, whereas the hydrogen bond is absent for  $*O$ . For OER intermediates, the adsorption Gibbs free energies can be expressed by Ref<sup>5</sup>.

It is widely known that the OER is typical reversible reaction. It involves the four-electron transfer processes and elementary reactions pathways are displayed as following equations:

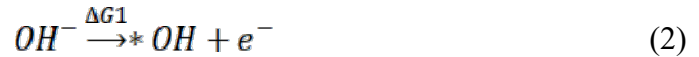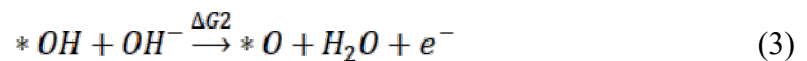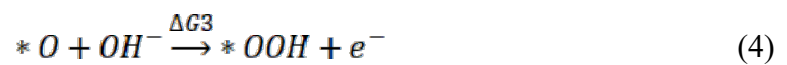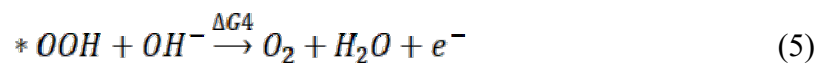

where the “\*” stand for the active adsorption site on catalysts.

According to the thermodynamics of OER, all the reaction steps are endothermic. The process with the largest endothermic process is the rate-determining step (RDS). The sample with the smallest  $U_L(\text{OER})$  value has the highest OER catalytic activity, as described in the following equation:

$$U_L(\text{OER}) = \text{Max}_i[\Delta G_i]/ne - 1.23 \text{ V} \quad (6)$$

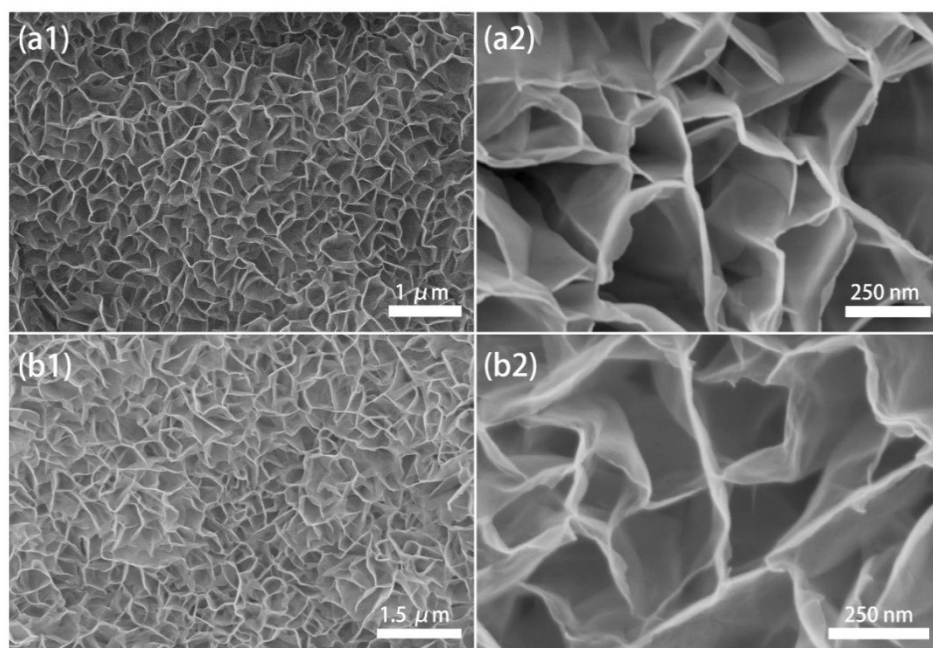

**Fig. S1.** SEM images of FeNi LDH (a1, 2) and (b1, 2) CM7-FeNi LDH.

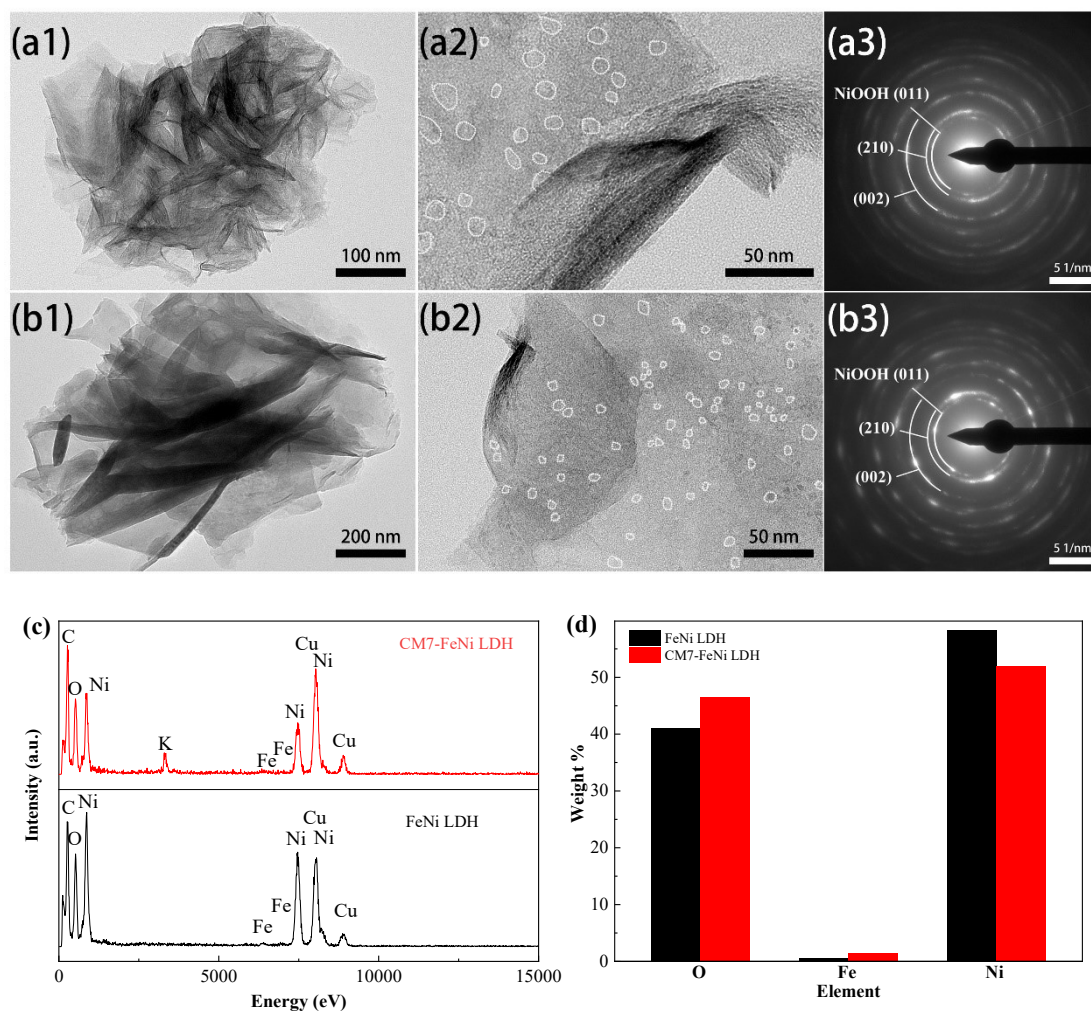

**Fig. S2.** TEM images and SAED patterns of (a) FeNi LDH and (b) CM7-FeNi LDH, (c) EDX and (d) element weight percentage of FeNi LDH and CM7-FeNi LDH.

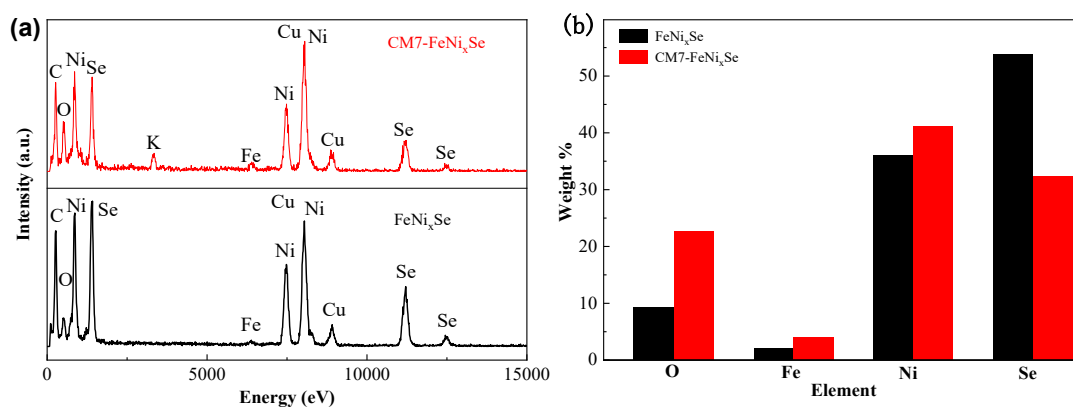

**Fig. S3.** (a) EDX and (b) percentage of element weight of CM7-FeNi<sub>x</sub>Se and FeNi<sub>x</sub>Se.

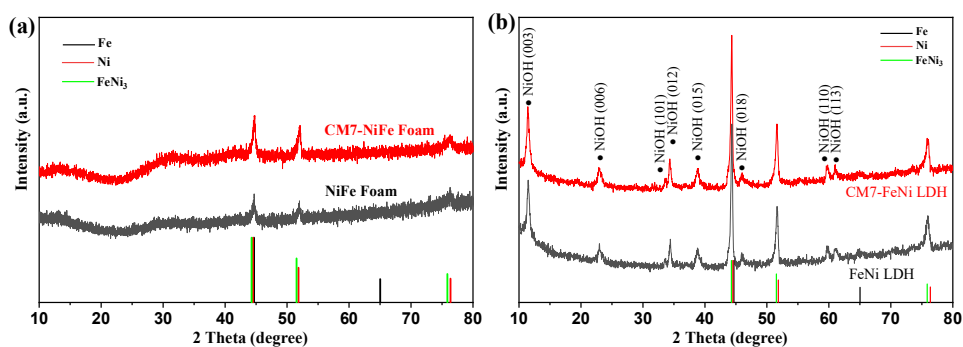

**Fig. S4.** (a) XRD patterns of NiFe Foam and CM7-NiFe Foam. (b) XRD patterns of FeNi LDH and CM7-FeNi LDH.

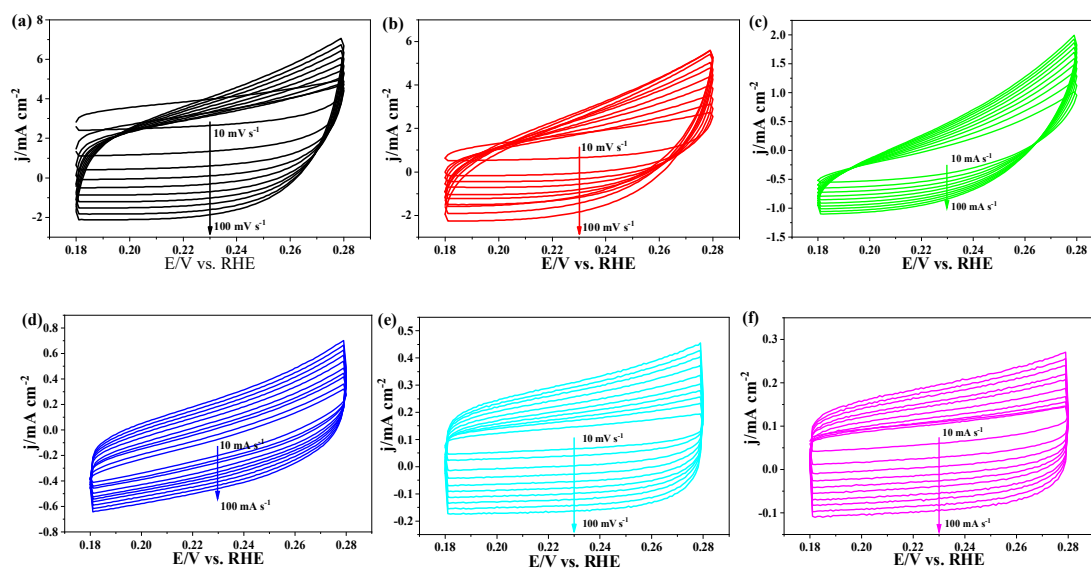

**Fig. S5.** CVs of (a) CM7-FeNi<sub>x</sub>Se, (b) FeNi<sub>x</sub>Se, (c) CM7-FeNi LDH, (d) FeNi LDH, (e) CM7-NiFe foam and (f) pure NiFe foam composite electrodes between the potential regions of 0.18 and 0.28 V (vs. RHE) with scan rates of 10, 20, 30, 40, 50, 60, 70 and 80 mV s<sup>-1</sup> in 1.0 M KOH solution.

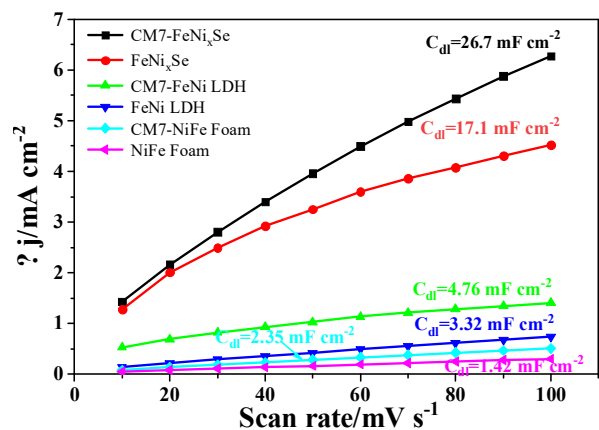

Fig. S6. Dependence of  $\Delta j$  on the scan rate at different double layer capacitances.

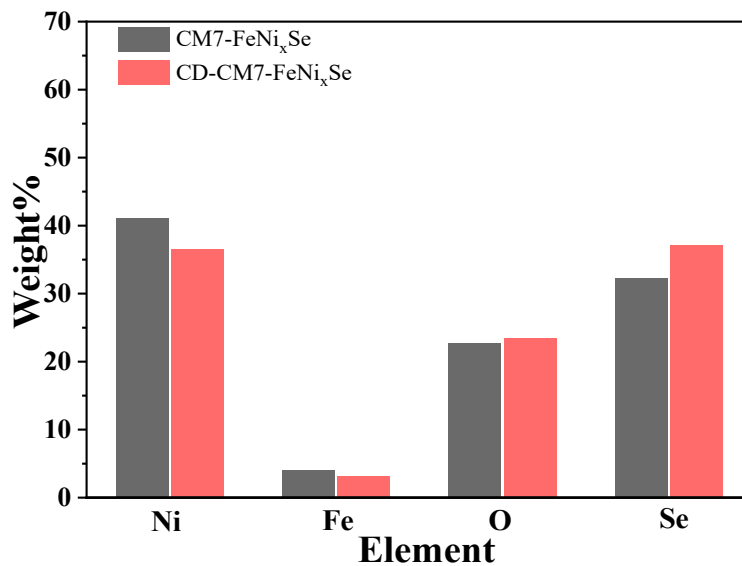

Fig. S7. Percentage of element weight of CD-CM7-FeNi<sub>x</sub>Se and CM7-FeNi<sub>x</sub>Se.



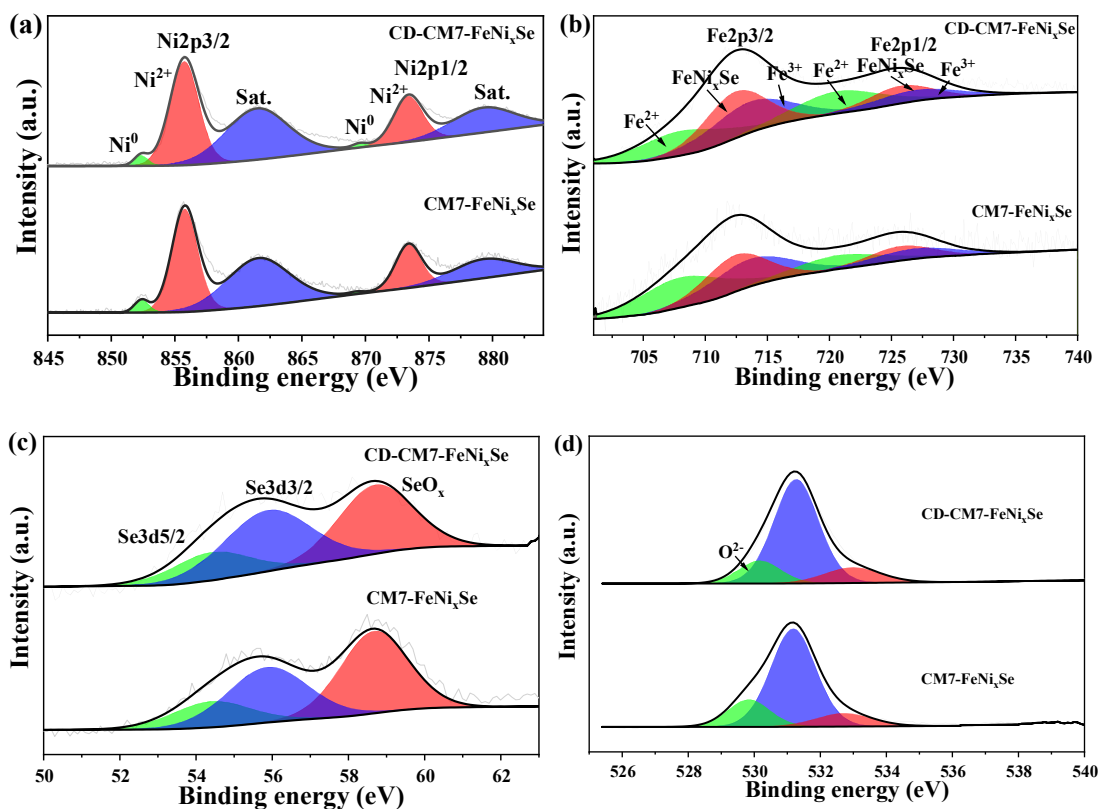

**Fig. S8.** High-resolution XPS spectra of (a) Ni 2p, (b) Fe 2p, (c) Se 3d and (d) O 1s of the CM7-FeNi<sub>x</sub>Se and CM7-FeNi<sub>x</sub>Se after chronopotentiometry test (CD-CM7-FeNi<sub>x</sub>Se) at constant current densities of 20 mA cm<sup>-2</sup> by 10 h.

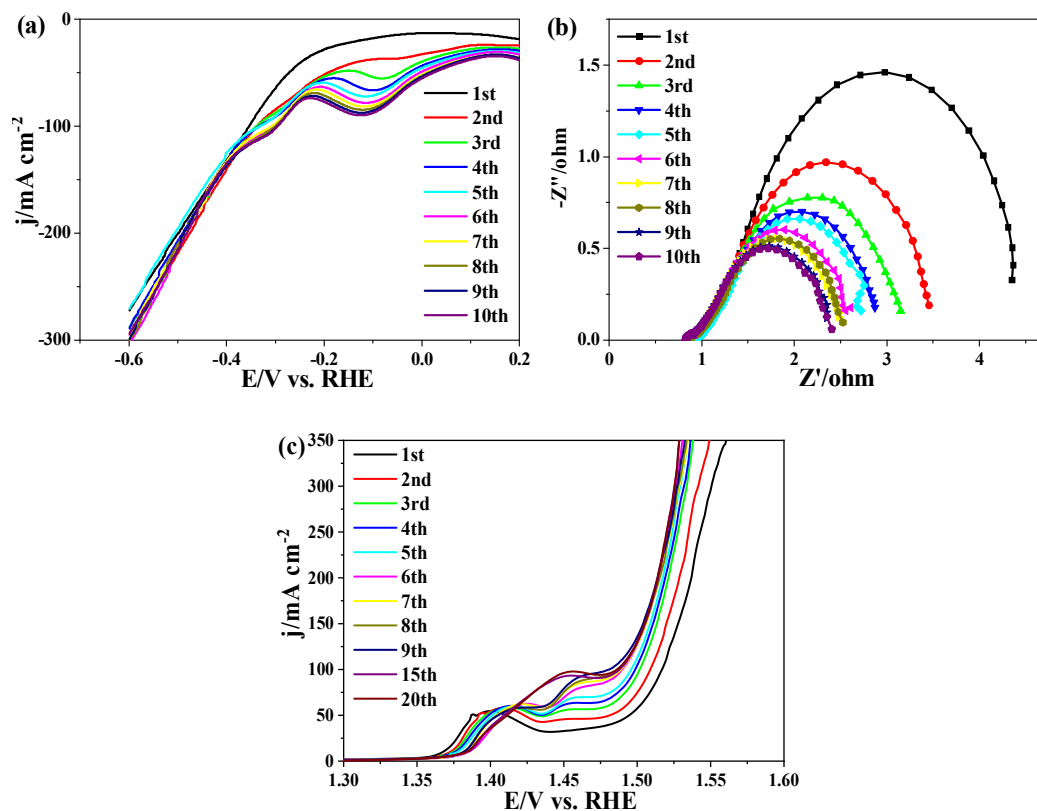

**Fig. S9.** (a) HER polarization curves, (b) Nyquist plots (overpotential=250 mV), and (c) OER polarization curves of CMy-FeNi<sub>x</sub>Se (y represents HER cycle times), conducted in 1.0 M KOH.

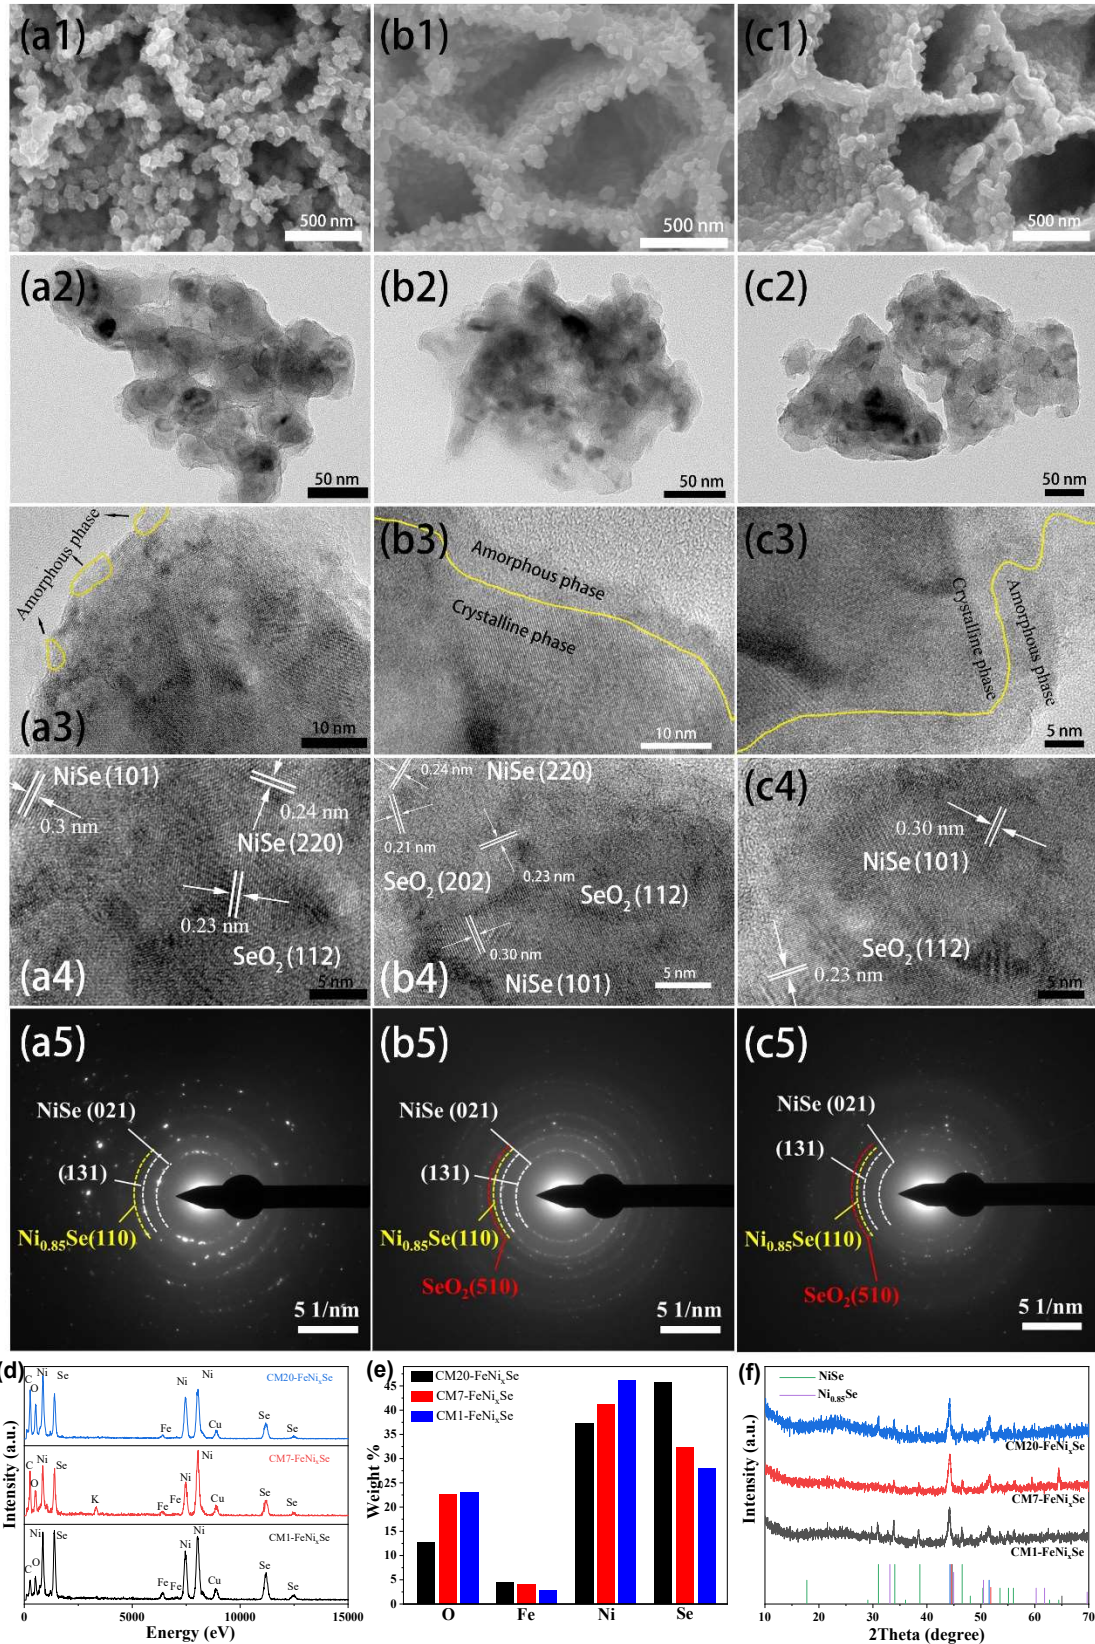

**Fig. S10.** SEM, TEM, HRTEM, SAED patterns of elements of (a1-5) CM1-FeNi<sub>x</sub>Se, (b1-5) CM7-FeNi<sub>x</sub>Se, (c1-5) CM20-FeNi<sub>x</sub>Se; (d) EDX, (e) element weight percentage, and (f) XRD patterns of CM1-FeNi<sub>x</sub>Se, CM7-FeNi<sub>x</sub>Se, CM20-FeNi<sub>x</sub>Se.

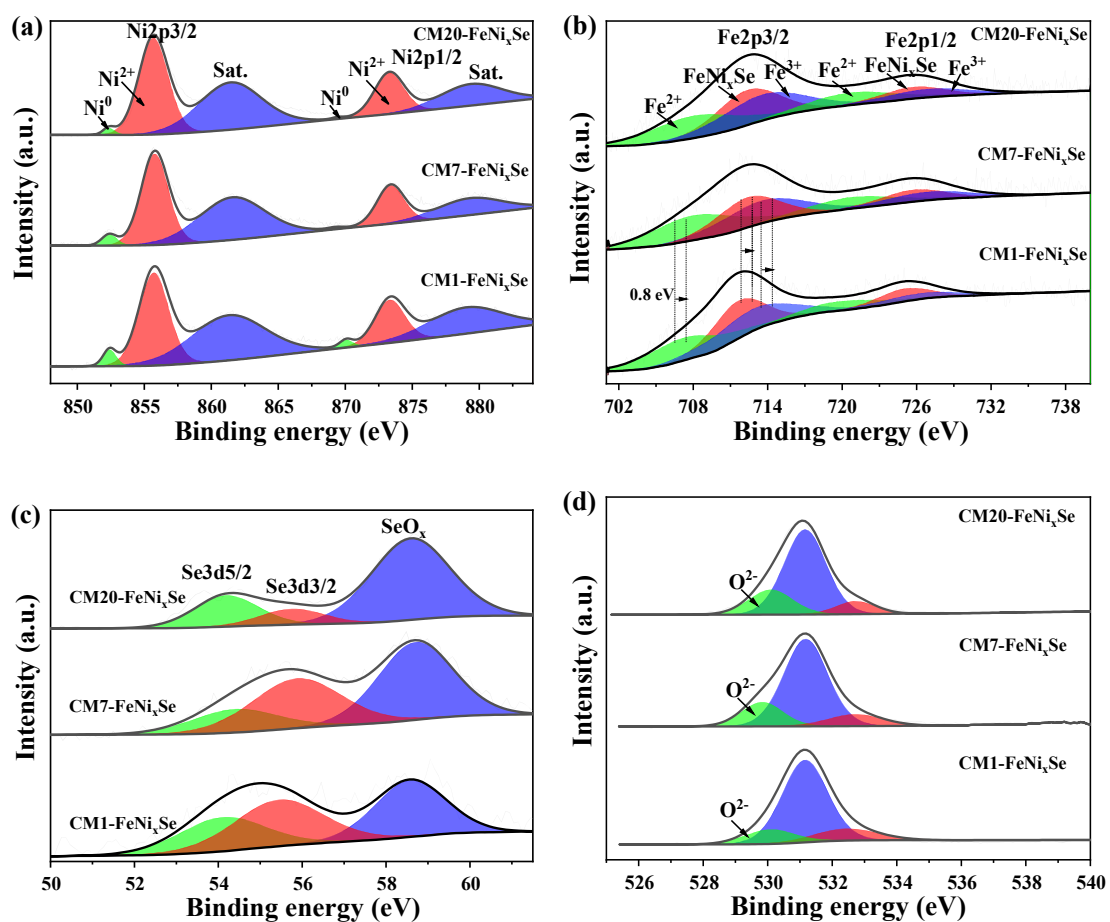

**Fig. S11.** High-resolution XPS spectra of (a) Ni 2p, (b) Fe 2p, (c) Se 3d and (d) O 1s of the CM1-FeNi<sub>x</sub>Se, CM7-FeNi<sub>x</sub>Se and CM20-FeNi<sub>x</sub>Se.

**Table S1.** OER catalytic activity comparison of the CM7-FeNi<sub>x</sub>Se with catalysts reported previously in the 1.0 M KOH.

| Materials                                         | Tafel Slope<br>/ mV dec <sup>-1</sup> | η <sub>OER</sub><br>/ mV                                                                          | References |
|---------------------------------------------------|---------------------------------------|---------------------------------------------------------------------------------------------------|------------|
| SeO <sub>x</sub> /FeNi <sub>x</sub> Se            | 31                                    | 150 (10 mA cm <sup>-2</sup> )<br>257 (100 mA cm <sup>-2</sup> )<br>285 (200 mA cm <sup>-2</sup> ) | This work  |
| NiSe/Ni <sub>3</sub> S <sub>2</sub>               | 89                                    | 340 (100 mA cm <sup>-2</sup> )                                                                    | 6          |
| Ni <sub>x</sub> Fe <sub>1-x</sub> Se <sub>2</sub> | 90                                    | 285 (10 mA cm <sup>-2</sup> )                                                                     | 7          |
| NiSe <sub>2</sub> /RGO                            | 34                                    | 241 (10 mA cm <sup>-2</sup> )                                                                     | 8          |
| O-NiSe@Ni/SS                                      | 48                                    | 290 (10 mA cm <sup>-2</sup> )                                                                     | 9          |
| NiSe <sub>2</sub> -CoSe <sub>2</sub> /NCF         | 48                                    | 250 (10 mA cm <sup>-2</sup> )                                                                     | 10         |
| Fe, Al-NiSe <sub>2</sub> /rGO                     | 48                                    | 272 (10 mA cm <sup>-2</sup> )                                                                     | 11         |
| Mo-Ni-Se@NF                                       | 44                                    | 397 (100 mA cm <sup>-2</sup> )                                                                    | 12         |
| MnSe@MOF-5/NF                                     | 61                                    | 170 (10 mA cm <sup>-2</sup> )                                                                     | 13         |
| Se-MnS/NiS                                        | 50                                    | 317 (100 mA cm <sup>-2</sup> )                                                                    | 14         |
| CoSe-0.2/NiSe-nrs/NF                              | 58                                    | 310 (100 mA cm <sup>-2</sup> )                                                                    | 15         |
| NiSe/NF                                           | 61                                    | 306 (100 mA cm <sup>-2</sup> )                                                                    | 16         |
| NiSe <sub>2</sub>                                 | 63                                    | 299 (10 mA cm <sup>-2</sup> )                                                                     | 17         |
| NiSe-Ni <sub>0.85</sub> Se/CP                     | 98                                    | 300 (10 mA cm <sup>-2</sup> )                                                                     | 18         |
| Fe-NiSe                                           | 43                                    | 220 (10 mA cm <sup>-2</sup> )                                                                     | 19         |

**Table S2.** Overall water splitting catalytic activity comparison of the Pt/C||CM7-FeNi<sub>x</sub>Se with catalysts reported previously in 1.0 M KOH.

| Materials                                                | Overall water splitting<br>η <sub>50</sub> / V | References |
|----------------------------------------------------------|------------------------------------------------|------------|
| SeO <sub>x</sub> /FeNi <sub>x</sub> Se                   | 1.64                                           | This work  |
| NiS <sub>0.5</sub> Se <sub>0.5</sub>                     | 1.67                                           | 20         |
| FeSe-NF                                                  | 1.85                                           | 21         |
| (Ni,Co) <sub>0.85</sub> Se                               | 1.87                                           | 22         |
| Se-(NiCo)S/OH                                            | 1.86                                           | 23         |
| A-NiSe <sub>2</sub>  P                                   | 1.73                                           | 24         |
| Se-MnS/NiS                                               | 1.66                                           | 14         |
| Co(S <sub>0.71</sub> Se <sub>0.29</sub> ) <sub>2</sub>   | 1.82                                           | 25         |
| hetero-Ni <sub>3</sub> Se <sub>4</sub> @NiFe LDH/CFC     | 1.71                                           | 26         |
| Co-O@Co-Se                                               | 1.73                                           | 27         |
| Ni <sub>0.75</sub> Fe <sub>0.25</sub> Se <sub>2</sub>    | 1.69                                           | 28         |
| Co <sub>0.75</sub> Ni <sub>0.25</sub> Se/NF              | 1.73                                           | 29         |
| Fe <sub>0.09</sub> Co <sub>0.13</sub> -NiSe <sub>2</sub> | 1.63                                           | 30         |

## References

1. J. Du, Z. Zou, C. Liu and C. Xu, *Nanoscale*, 2018, 10, 5163-5170.

2. G. Kresse and J. Furthmüller, *Phys. Rev. B*, 1996, 54, 11169-11186.
3. P. E. Blöchl, *Phys. Rev. B*, 1994, 50, 17953-17979.
4. M. C. Payne, M. P. Teter, D. C. Allan, T. A. Arias and J. D. Joannopoulos, *Rev. Mod. Phys.*, 1992, 64, 1045-1097.
5. C.-Y. Su, H. Cheng, W. Li, Z.-Q. Liu, N. Li, Z. Hou, F.-Q. Bai, H.-X. Zhang and T.-Y. Ma, *Adv. Energy Mater*, 2017, 7, 1602420.
6. L. Tie, Y. Liu, S. Shen, C. Yu, J. Sun and J. Sun, *Appl. Surf. Sci.*, 2020, 526, 146745.
7. Y. Li, R. Chen, D. Yan and S. Wang, *Chem.-Asian J.*, 2020, 15, 3845-3852.
8. P. Wei, Z. Hao, Y. Yang, M. Liu, H. Zhang, M.-R. Gao and S.-H. Yu, *Nano Res.*, 2020, 13, 3292-3298.
9. Y.-Y. Sun, Y.-X. Zhu, L.-K. Wu, G.-Y. Hou, Y.-P. Tang, H.-Z. Cao and G.-Q. Zheng, *Electrochim. Acta*, 2020, 353, 136519.
10. D. Chen, Z. Xu, W. Chen, G. Chen, J. Huang, C. Song, C. Li and K. Ostrikov, *J. Mater. Chem. A*, 2020, 8, 12035-12044.
11. L. Chen, H. Jang, M. G. Kim, Q. Qin, X. Liu and J. Cho, *Nanoscale*, 2020, 12, 13680-13687.
12. H. Yang, Y. Huang, W. Y. Teoh, L. Jiang, W. Chen, L. Zhang and J. Yan, *Electrochim. Acta*, 2020, 349, 136336.
13. M. Fiaz and M. Athar, *JOM*, 2020, 72, 2219-2225.
14. J. Zhu, M. Sun, S. Liu, X. Liu, K. Hu and L. Wang, *J. Mater. Chem. A*, 2019, 7, 26975-26983.
15. J. Du, S. You, X. Li, B. Tang, B. Jiang, Y. Yu, Z. Cai, N. Ren and J. Zou, *ACS Appl. Mater. Interfaces*, 2020, 12, 686-697.
16. S. Esmailzadeh, T. Shahrabi, G. Barati Darband and Y. Yaghoubinezhad, *Electrochim. Acta*, 2020, 334, 135549.
17. C. Cai, Y. Mi, S. Han, Q. Wang, W. Liu, X. Wu, Z. Zheng, X. Xia, L. Qiao, W. Zhou and

- X. Zu, *Electrochim. Acta*, 2019, 295, 92-98.
18. Y. Chen, Z. Ren, H. Fu, X. Zhang, G. Tian and H. Fu, *Small*, 2018, 14, 1800763.
  19. B. Xu, Z. Chen, X. Yang, X. Wang, Y. Huang and C. Li, *Chem. Commun.*, 2018, 54, 9075-9078.
  20. Y. Wang, X. Li, M. Zhang, Y. Zhou, D. Rao, C. Zhong, J. Zhang, X. Han, W. Hu, Y. Zhang, K. Zaghbi, Y. Wang and Y. Deng, *Adv. Mater.*, 2020, 32, 2000231.
  21. D. Chanda, R. A. Tufa, Y. Y. Birdja, S. Basu and S. Liu, *Int. J. Hydrogen Energy*, 2020, 45, 27182-27192.
  22. K. Xiao, L. Zhou, M. Shao and M. Wei, *J. Mater. Chem. A*, 2018, 6, 7585-7591.
  23. C. Hu, L. Zhang, Z.-J. Zhao, A. Li, X. Chang and J. Gong, *Adv. Mater.*, 2018, 30, 1705538.
  24. J. Lin, H. Wang, J. Cao, F. He, J. Feng and J. Qi, *J. Colloid Interf. Sci.*, 2020, 571, 260-266.
  25. L. Fang, W. Li, Y. Guan, Y. Feng, H. Zhang, S. Wang and Y. Wang, *Adv. Funct. Mater.*, 2017, 27, 1701008.
  26. T. Zhang, L. Hang, Y. Sun, D. Men, X. Li, L. Wen, X. Lyu and Y. Li, *Nanoscale Horiz.*, 2019, 4, 1132-1138.
  27. W. Q. Yang, Y. X. Hua, Q. B. Zhang, H. Lei and C. Y. Xu, *Electrochim. Acta*, 2018, 273, 71-79.
  28. X. Hu, Q. Zhou, P. Cheng, S. Su, X. Wang, X. Gao, G. Zhou, Z. Zhang and J. Liu, *Appl. Surf. Sci.*, 2019, 488, 326-334.
  29. S. Liu, Y. Jiang, M. Yang, M. Zhang, Q. Guo, W. Shen, R. He and M. Li, *Nanoscale*, 2019, 11, 7959-7966.
  30. Y. Sun, K. Xu, Z. Wei, H. Li, T. Zhang, X. Li, W. Cai, J. Ma, H. J. Fan and Y. Li, *Adv. Mater.*, 2018, 30, 1802121.
